# Supplementary material for: Non-absorbable apple procyanidins prevent obesity associated with gut microbial and metabolomic changes
Source: PubMed Central journal article supplement (PMC4979010; doi:10.1038/srep31208), 2016-08-10
Supplement: srep31208-s1.pdf [file srep31208-s1.pdf]

1 **SUPPORTING INFORMATION**

2 **Title: Non-absorbable apple procyanidins prevent obesity associated with gut microbial**  
3 **and metabolomic changes**

4

5 **Authors:** Saeko Masumoto,<sup>1</sup> Akari Terao,<sup>2</sup> Yuji Yamamoto,<sup>2</sup> Takao Mukai,<sup>2</sup> Tomisato Miura,<sup>3</sup>  
6 Toshihiko Shoji<sup>1</sup>

7

8 **Affiliations:**

9 <sup>1</sup>National Institute of Fruit Tree Science, National Agriculture & Food Research, Tsukuba,  
10 Ibaraki, Japan

11 <sup>2</sup>Department of Animal Science, School of Veterinary Medicine, Kitasato University, Towada,  
12 Aomori, Japan

13 <sup>3</sup>Hirosaki University Graduate School of Health Sciences, Hirosaki, Aomori, Japan

14

15 **Corresponding author:**

16 Toshihiko Shoji, PhD

17 NARO Institute of Fruit Tree Science, The National Agriculture & Food Research, 2-1 Fujimoto,  
18 Tsukuba, Ibaraki 305-8605, Japan. Tel: +81-298-38-6470; Fax: +81-298-38-6437; e-mail:

19 tshoji@affrc.go.jp

20

## 21 SUPPLEMENTARY METHODS

22

### 23 Procyanidin analysis

24 Apple procyanidins were filtered through a 0.45- $\mu$ m PTFE syringe filter prior to injection into a  
25 Prominence HPLC system (Shimazu Corporation, Kyoto, Japan) equipped with a RF-20AXS  
26 fluorescence detector (Shimazu) and an Inertsil WP300 Diol (GL Science Inc., Tokyo, Japan)  
27 column (*i.d.* 4.6  $\times$  250 mm; 5  $\mu$ m). Mixtures of acetonitrile and acetic acid (mobile phase A,  
28 CH<sub>3</sub>CN:HOAc = 98:2) and methanol, H<sub>2</sub>O, and acetic acid (mobile phase B, MeOH:H<sub>2</sub>O:HOAc  
29 = 95:3:2) were used as mobile phases. Elution was performed using a linear gradient of 0–7% B  
30 for 0–3.0 min, followed by a linear gradient of 7–30% B for 57.0 min. Subsequently, mobile  
31 phase B content was increased from 30% to 100% over 60.0–70.0 min. The mobile phase was  
32 subsequently returned to the initial conditions (0% B) to re-equilibrate for 10.0 min. The sample  
33 injection volume was 5  $\mu$ L, the flow rate was set at 1.0 mL/min, and fluorescence detection of  
34 procyanidins was performed with excitation and emission wavelengths of 230 and 321 nm,  
35 respectively.

36

### 37 Metabolomic analysis by HPLC-QTOF/MS

38 Urine samples were analyzed by high performance liquid chromatography–quadrupole time-of-  
39 flight/mass spectrometry (HPLC-QTOF/MS) coupled with a hybrid Q-TOF TripleTOF<sup>®</sup> 5600  
40 system (AB SCIEX) with a DuoSpray electrospray ionization (ESI) ion source and a Dionex  
41 UltiMate 3000 HPLC system (Dionex Corporation, Idstein, Germany). The column was an  
42 ACQUITY UPLC<sup>®</sup> BEH C18 (Waters Co., Milford, MA, USA) column (*i.d.* 2.1  $\times$  50 mm; 1.7  
43  $\mu$ m) at 40 °C. A mixture of 0.1% formic acid in distilled water (mobile phase A) and 0.1%  
44 formic acid in acetonitrile (mobile phase B) was used as the mobile phase. The initial eluent was  
45 0% B for 0–2.0 min, followed by a linear gradient from 0 to 50% B for 8.0 min. Subsequently,

46 mobile phase B was increased from 50% to 95% over 10.0–11.5 min. The mobile phase was  
47 returned to the initial conditions (0% B) to re-equilibrate for 3.5 min. The injection volume was  
48 0.5  $\mu$ L of the sample solution. The flow rate was set at 0.3 mL/min.

49  
50 Data were acquired using an ion spray voltage of -4500 mV. The declustering potential was -80  
51 V. The temperature was 650 °C. N<sub>2</sub> was used as the curtain (25 arbitrary units) and nebulizer (50  
52 arbitrary units) gases. The instrument was set to perform one TOF/MS survey scan (150 ms) and  
53 10 MS/MS scans (30 ms). MS acquisition was performed in negative ionization mode with a  
54 mass-to-charge ratio ( $m/z$ ) of 120–1400 from 0 to 12 min. Mass accuracy was maintained by the  
55 use of an automated calibrant delivery system (AB SCIEX) interfaced to the second inlet of the  
56 DuoSpray source. The TOF was calibrated with Irganox 1010 ( $m/z$  1175.7768; Sigma-Aldrich,  
57 St. Louis, MO, USA). The MS/MS analyses were performed with collision energy (CE) of  $-30 \pm$   
58 15 V.

59  
60 *Data processing*

61 The MS data were analyzed using MarkerView<sup>®</sup> Software (version 1.2.1, AB SCIEX). Peaks  
62 were identified for each sample, whereas alignment was performed using  $m/z$  values and  
63 retention times for the peaks for multivariate analysis. Peak finding was performed using a  
64 minimum spectral peak width of 1 ppm, a noise threshold of 5, and a subtraction multiple factor  
65 of 1.2. Alignment and filtering were used to ensure mass tolerance of 0.04 Da and retention time  
66 tolerance of 0.25 min.

67  
68 *Multivariate analysis*

69 Several statistical analyses, including principal component analysis (PCA), t-tests, and PCA-  
70 discriminant analysis (PCA-DA) were performed using MarkerView<sup>®</sup> Software. The data were

71 visualized by constructing principal component scores and loading plots. Each point on the  
72 scores plot represented an individual urine sample, whereas each point on the loadings plot  
73 represented a single mass spectrometry data point.

74

#### 75 *Metabolite identification*

76 Markers contributing to the discrimination of the different groups of rats were identified on the  
77 basis of exact mass, which was compared to the theoretical mass of expected metabolites. The  
78 data for each urine sample was subjected to isotope pattern-matched peak mining using the  
79 Extracted Ion Chromatogram Manager add-on for PeakView<sup>®</sup> Software (version 1.1.1, AB  
80 SCIEX). Assignment of the spectral peaks was confirmed using appropriate standards and mass  
81 fragmentation (MS/MS analyses). The Human Metabolome Database (HMDB; [www.hmdb.ca](http://www.hmdb.ca))  
82 and Phenol-Explorer (<http://www.phenol-explorer.eu/>) database were queried by molecular  
83 formula to identify chemical structures.

84

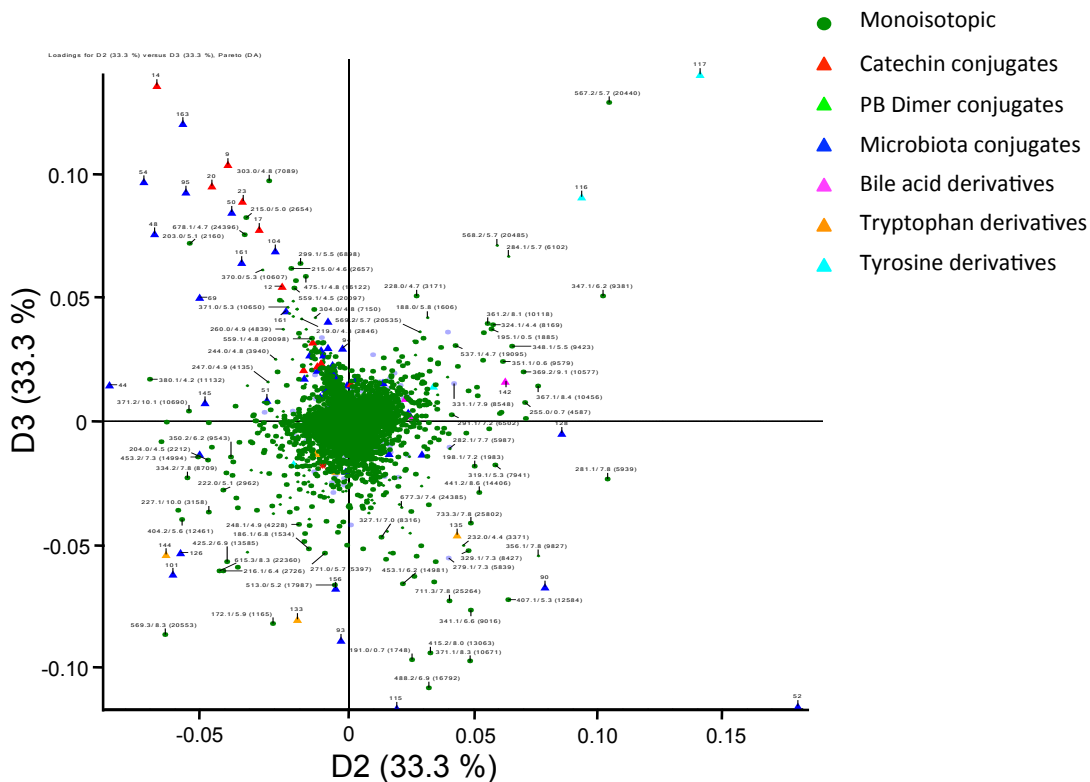

**Supplementary figure 1. PP-treated mice urine metabolomes are distinct from those of HFHS diet-induced obesity mice.** The loading plot obtained via principal component analysis-discriminant analysis (PCA-DA) of the urine metabolites of mice treated for 20 weeks are shown. Metabolomics by HPLC-QTOF/MS was performed by the method described in the online supplementary method.
